# Supplementary material
Source: PubMed Central journal article supplement (PMC8078130)
Supplement: str-52-e117-s001.pdf [file str-52-e117-s001.pdf]

# SUPPLEMENTAL MATERIALS

## Methods

[Supplemental Document I. Detailed Study Design](#)

[Supplemental Table I. Countries' Health Expenditures](#)

[Supplemental Figure I. Countries' Health Expenditures](#)

## Results

[Supplemental Table II. Subgroups of AIS Patients based on Geographical Regions](#)

[Supplemental Table III. Subgroups of AIS Patients According to the Countries' Health Expenditure](#)

[Supplemental Table IV. Subgroups of AIS Patients based on Sex](#)

[Supplemental Table V. Subgroups of AIS Patients Younger or Older than 55-year-old](#)

[Supplemental Table VI. Subgroups of AIS Patients Younger or Older than 65-year-old](#)

[Supplemental Table VII. Subgroups of AIS Patients with Stroke as the Chief Complaints Versus Others](#)

[Supplemental Table VIII. Subgroups of AIS Patients According to the Imaging Patterns](#)

# SARS-CoV-2 and Stroke Characteristics:

## A Report from the Multinational COVID-19 Stroke Study Group

### Authors

Shima Shahjouei, MD, MPH,<sup>1</sup> Georgios Tsivgoulis, MD, PhD, MSc,<sup>2</sup> Ghasem Farahmand, MD,<sup>3,4</sup> Eric Koza, MD Candidate,<sup>5</sup> Ashkan Mowla, MD,<sup>1,6</sup> Alireza Vafaei Sadr, PhD,<sup>7</sup> Arash Kia, MD,<sup>8</sup> Alaleh Vaghefi Far, MD,<sup>4</sup> Stefania Mondello, MD, PhD, MPH,<sup>9</sup> Achille Cernigliaro, PhD, MPH,<sup>10</sup> Annemarei Ranta, MD, PhD, FRACP,<sup>11</sup> Martin Punter, PhD, MBChB,<sup>11</sup> Faezeh Khodadadi, Pharm.D,<sup>12</sup> Soheil Naderi, MD,<sup>13</sup> Mirna Sabra, PhD,<sup>14</sup> Mahtab Ramezani, MD,<sup>15</sup> Ali Amini Harandi, MD,<sup>15</sup> Oluwaseyi Olulana, MS,<sup>5</sup> Durgesh Chaudhary, MBBS,<sup>1</sup> Aicha Lyoubi, MD,<sup>16</sup> Bruce Campbell, MD,<sup>17,18</sup> Juan F. Arenillas, MD,<sup>19</sup> Daniel Bock, MD,<sup>20</sup> Joan Montaner, MD,<sup>21</sup> Saeideh Aghayari Sheikh Neshin, MD,<sup>22</sup> Diana Aguiar de Sousa, MD, PhD,<sup>23</sup> Matthew S. Tenser, MD,<sup>6</sup> Ana Aires, MD,<sup>24,25</sup> Mercedes De Lera Alfonso, MD,<sup>19</sup> Orkhan Alizada,<sup>26</sup> MD, Elsa Azevedo, MD,<sup>24,25</sup> Nitin Goyal, MD,<sup>27</sup> Zabihollah Babaeepour, MD,<sup>28</sup> Gelareh Banihashemi, MD,<sup>29</sup> Leo H. Bonati, MD,<sup>30</sup> Carlo Cereda, MD,<sup>31</sup> Jason J. Chang, MD,<sup>32</sup> Miljenko Crnjakovic, MD,<sup>33</sup> GianMarco De Marchis, MD,<sup>34</sup> Massimo Del Sette, MD,<sup>35</sup> Seyed Amir Ebrahimzadeh, MD, MPH,<sup>36</sup> Mehdi Farhoudi, MD,<sup>37</sup> Ilaria Gandoglia, MD,<sup>35</sup> Bruno Gonçalves, MD,<sup>38</sup> Christoph Griessenauer, MD,<sup>1</sup> Mehmet Murat Hanci, MD,<sup>26</sup> Aristeidis H. Katsanos, MD,<sup>2,39</sup> Christos Krogias, MD,<sup>40</sup> Ronen Leker, MD,<sup>41</sup> Lev Lotman, MD,<sup>42</sup> Jeffrey Mai, MD,<sup>43</sup> Shailesh Male, MD,<sup>44</sup> Konark Malhotra, MD,<sup>45</sup> Branko Malojcic, MD, PhD,<sup>46</sup> Teresa Mesquita, MD,<sup>47</sup> Asadollah Mirghasemi, MD,<sup>48</sup> Hany Mohamed Aref, MD,<sup>49</sup> Zeinab Mohseni Afshar, MD,<sup>50</sup> Jusun Moon, MD,<sup>51</sup> Mika Niemelä, MD, PhD,<sup>52</sup> Behnam Rezaei Jahromi, MD, <sup>52</sup> Lawrence Nolan, MD,<sup>41</sup> Abhi Pandhi, MD,<sup>27</sup> Jong-Ho Park, MD,<sup>53</sup> João Pedro Marto, MD,<sup>46</sup> Francisco Purroy, MD, PhD,<sup>54</sup> Sakineh Ranji-Burachaloo, MD,<sup>3</sup> Nuno Reis Carreira, MD,<sup>55</sup> Manuel Requena, MD,<sup>56</sup> Marta Rubiera, MD,<sup>56</sup> Seyed Aidin Sajedi, MD,<sup>57</sup> João Sargento-Freitas, MD, <sup>58</sup> Vijay Sharma, MD,<sup>59</sup> Thorsten Steiner, MD,<sup>60,61</sup> Kristi Temprow, MD,<sup>41</sup> Guillaume Turc,<sup>38</sup> MD, PhD, FESO, Yasaman Ahmadzadeh, MD,<sup>62</sup> Mostafa Almasi-Dooghaee, MD,<sup>63,64</sup> Farhad Assarzagdegan, MD,<sup>14</sup> Arefeh Babazadeh, MD, MPH,<sup>65</sup> Humain Baharvahdat, MD,<sup>66</sup> Fabricio Cardoso, MD, MPH,<sup>67</sup> Apoorva Dev, PhD,<sup>12</sup> Mohammad Ghorbani, MD,<sup>68</sup> Ava Hamidi, MD,<sup>69</sup> Zeynab Sadat Hasheminejad, MD,<sup>70</sup> Sahar Hojjat-Anasri Komachali, MD,<sup>71</sup> Fariborz Khorvash, MD,<sup>72</sup> Firas Kobeissy, PhD,<sup>73</sup> Hamidreza Mirkarimi, MD,<sup>74</sup> Elahe Mohammadi-Vosough, MD,<sup>74</sup> Debdipto Misra, MS,<sup>75</sup> Ali Reza Noorian, MD,<sup>76</sup> Peyman Nowrouzi-Sohrabi, PhD,<sup>77</sup> Sepideh Paybast, MD,<sup>78</sup> Leila Poorsaadat, MD,<sup>79</sup> Mehrdad Roozbeh, MD,<sup>80</sup> Behnam Sabayan, MD, PhD,<sup>81</sup> Saeideh Salehizadeh, MD,<sup>82</sup> Alia Saberi, MD,<sup>22</sup> Mercedeh Sepehrnia, MD,<sup>70</sup> Fahimeh Vahabizad, MD,<sup>29</sup> Thomas Yasuda, MD,<sup>67</sup> Mojdeh Ghabaei, MD,<sup>3,4</sup> Nasrin Rahimian, MD, MPH,<sup>83</sup> Mohammad Hossein Harirchian, MD,<sup>3</sup> Afshin Borhani-Haghighi, MD,<sup>84</sup> Mahmoud Reza Azarpazhooh, MD,<sup>85</sup> Rohan Arora, MD,<sup>86</sup> Saeed Ansari, MD,<sup>27</sup> Venkatesh Avula, MS,<sup>87</sup> Jiang Li, MD,<sup>88</sup> Vida Abedi, PhD,<sup>87,88</sup> Ramin Zand, MD, MPH.<sup>1</sup>

<sup>1</sup>Neurology Department, Neuroscience Institute, Geisinger Health System, Pennsylvania, USA;

<sup>2</sup>Second Department of Neurology, National and Kapodistrian University of Athens, School of Medicine, "Attikon" University Hospital, Athens, Greece;

<sup>3</sup>Iranian Center of Neurological Research, Neuroscience Institute, Tehran University of Medical Sciences, Tehran, Iran;

<sup>4</sup>Neurology Department, Tehran University of Medical Sciences, Tehran, Iran;

<sup>5</sup>Geisinger Commonwealth School of Medicine, Scranton, Pennsylvania, USA;

<sup>6</sup>Division of Stroke and Endovascular Neurosurgery, Department of Neurological Surgery, Keck School of Medicine, University of Southern California, California, USA;

<sup>7</sup>Department de Physique Theorique and Center for Astroparticle Physics, University Geneva, Switzerland;

<sup>8</sup>Icahn school of medicine at Mount Sinai, Department of Population Health Science and Policy, Institute for Healthcare Delivery Science, New York, USA;

<sup>9</sup>Department of Biomedical and Dental Sciences and Morphofunctional Imaging, University of Messina, Messina, Italy;

<sup>10</sup>Regional Health Authority of Sicily, Palermo, Italy;

<sup>11</sup>Department of Neurology, Wellington Hospital, Wellington, New Zealand;

<sup>12</sup>PES University, Bangalore, Karnataka, India;

<sup>13</sup>Department of Neurosurgery, Tehran University of Medical Sciences, Tehran, Iran;

<sup>14</sup>Neurosciences Research Center (NRC), Lebanese University/ Medical School, Beirut, Lebanon;

<sup>15</sup>Neurology Department, Shahid Beheshti University of Medical Sciences, Tehran, Iran;

<sup>16</sup>Neurology Department, Delafontaine Hospital, Saint-Denis, France;

<sup>17</sup>Department of Neurology, Royal Melbourne Hospital, Parkville, Australia;

18University of Melbourne, Parkville, Australia;  
19Department of Neurology, University of Valladolid, Valladolid, Spain;  
20Department of Cardiology, Klinikum Frankfurt Höchst, Frankfurt Germany;  
21Department of Neurology, Hospital Universitario Virgen Macarena, Sevilla, Spain;  
22Neurology Department, Poursina Hospital, Rasht, Guilan, Iran;  
23Department of Neurology, Hospital de Santa Maria, University of Lisbon, Lisbon, Portugal;  
24Department of Neurology, Centro Hospitalar Universitário de São João, Porto, Portugal;  
25Faculty of Medicine, University of Porto, Porto, Portugal;  
26Neurosurgery Department, Istanbul University-Cerrahpasa, Cerrahpasa Medical Faculty, Istanbul, Turkey;  
27Department of Neurology, University of Tennessee, Tennessee, USA;  
28Neurology Ward, Valiasr Hospital, Borujen, Iran;  
29Neurology Department, Sina Hospital, Tehran University of Medical Sciences, Tehran, Iran;  
30Department of Neurology and Stroke Unit, University Hospital Basel, Switzerland;  
31Stroke Center, Neurocenter of Southern Switzerland, Lugano, Switzerland;  
32Department of Critical Care Medicine, MedStar Washington Hospital Center, Washington, DC, USA;  
33Intensive Care Unit, Department of Neurology, Clinical Hospital Dubrava, Zagreb, Croatia;  
34Neurorehabilitation Unit, University Center for Medicine of Aging and Rehabilitation Basel, Felix Platter Hospital, University of Basel, Switzerland;  
35Neurology Unit, Galliera Hospital, Genova, Italy;  
36Department of Radiology, Yasrebi Hospital, Kashan, Iran;  
37Neurosciences Research Center (NSRC), Tabriz University of Medical Sciences, Tabriz, Iran;  
38Department of Neurology, GHU Paris Psychiatrie et Neurosciences, Université de Paris, INSERM U1266, Paris, France;  
39Division of Neurology, McMaster University/ Population Health Research Institute, Hamilton, ON, Canada;  
40Department of Neurology, St. Josef-Hospital, Ruhr University Bochum, Bochum, Germany;  
41Department of Neurology, Hadassah-Hebrew University Medical Center, Jerusalem, Israel;  
42Department of Neurology, Albany Medical Center, Albany, NY;  
43Department of Neurosurgery, Georgetown University and MedStar Washington Hospital Center, Washington, DC, USA;  
44Neurology Department, Vidant Medical Center, Greenville, North Carolina, USA;  
45Department of Neurology, Allegheny Health Network (AHN), Pittsburgh, Pennsylvania, USA;  
46TIA Clinic, Department of Neurology, University Hospital Centre Zagreb, Zagreb School of Medicine, University of Zagreb, Zagreb, Croatia;  
47Department of Neurology, Hospital de Egas Moniz, Centro Hospitalar Lisboa Ocidental, Lisbon, Portugal;  
48Department of Anesthesiology, University of Ottawa, Canada;  
49Department of Neurology, Ain Shams University, Cairo, Egypt;  
50Infection Disease Research Center, Kermanshah University of Medical Sciences, Kermanshah, Iran;  
51Department of Neurology, National Medical Center, Seoul, South Korea;  
52Department of Neurosurgery, Helsinki University Hospital, Helsinki, Finland;  
53Department of Neurology, Myongji Hospital, Hanyang University College of Medicine, South Korea;  
54Department of Neurology, Hospital Arnau de Vilanova, Lleida, Spain;  
55Department of Neurology, Hospital Arnau de Vilanova, Institut de Recerca Biomèdica de Lleida (IRBLleida), Universitat de Lleida UdL Lleida, Spain;  
56Stroke Unit, Department of Neurology, Hospital Vall d'Hebron, Department de Medicina, Universitat Autònoma de Barcelona, Barcelona, Spain;  
57Neuroscience Research Center, Department of Neurology, Golestan University of Medical Sciences, Golestan, Iran;  
58Department of Neurology, Centro Hospitalar e Universitário de Coimbra, Coimbra, Portugal;  
59Division of Neurology, University Medicine Cluster, National University Health System, Singapore, Singapore;  
60Department of Neurology, Klinikum Frankfurt Höchst, Frankfurt, Germany;  
61Department of Neurology Heidelberg University Hospital, Germany;  
62 Hospital for Special Surgery, New York, USA;  
63Divisions of Vascular and Endovascular Neurosurgery and Neurology, Firoozgar Hospital, Iran University of Medical Sciences, Tehran, Iran;  
64Divisions of Vascular and Endovascular Neurosurgery and Neurology, Rasoul-Akram Hospital, Iran University of Medical Sciences, Tehran, Iran;  
65Infectious Diseases and Tropical Medicine Research Center, Health Research Institute, Babol University of Medical Sciences, Babol, Iran;  
66Neurosurgical Department, Ghaem Hospital, Mashhad University of Medical Sciences, Mashhad, Iran;  
67Neurology Department, Centro Médico de Campinas, São Paulo, Brazil;  
68Division of Vascular and Endovascular Neurosurgery, Firoozgar Hospital, Iran University of Medical Sciences, Tehran, Iran;

69Neurology Ward, Gheshm Hospital, Gheshm, Iran;  
70Department of Neurology, Imam Hosein Hospital, Shahid Beheshti Medical University, Tehran, Iran;  
71Department of Neurology, Pirooz hospital, Gilan University of Medical Sciences, Lahijan, Iran;  
72Professor Of Neurology, Isfahan University of Neurology, Isfahan, Iran;  
73Program of Neurotrauma, Neuroproteomics and Biomarker Research (NNBR), University of Florida, Florida, USA;  
74Neurology Ward, Modarres Hospital, Kashmar, Iran;  
75Steele Institute of Health & Innovation, Geisinger Health System, Pennsylvania, USA;  
76Department of Neurology, Southern California Permanente Medical Group, Irvine, California, USA;  
77Student Research Committee, Shiraz University of Medical Sciences, Shiraz, Iran;  
78Department of Neurology, Bou Ali hospital, Qazvin University of Medical Sciences, Qazvin, Iran;  
79Department of Neurology, Arak University of Medical Sciences, Arak, Iran;  
80Brain Mapping Research Center, Shahid Beheshti University of Medical Sciences, Tehran, Iran;  
81Department of Neurology, Massachusetts General Hospital, Harvard Medical School, Boston, MA, USA;  
82Salahadin Ayubi Hospital, Baneh, Iran;  
83Department of Neurology, Yasrebi Hospital, Kashan, Iran;  
84Clinical Neurology Research Center, Shiraz University of Medical Sciences, Shiraz, Iran;  
85Neurology Department, Western University, Canada;  
86Department of Neurology, Long Island Jewish Forest Hills, Queens, New York, USA;  
87Department of Molecular and Functional Genomics, Geisinger Health System, Danville, Pennsylvania, USA;  
88Biocomplexity Institute, Virginia Tech, Blacksburg, Virginia, USA.

Corresponding Author:

Ramin Zand M.D., M.P.H.

Neuroscience Institute, Geisinger,

100 North Academy Ave. Danville, PA, 17822

phone number: 570-214-4101

Fax number: (570) 808-3208

E-mail address: [rzand@geisinger.edu](mailto:rzand@geisinger.edu); [ramin.zand@gmail.com](mailto:ramin.zand@gmail.com)

[Laboratory: www.thedecodelab.com](http://www.thedecodelab.com)

# METHODS

## **Methods; Supplemental Document I. Detailed Study Design**

This multicenter, multinational observational study was conducted and reported according to the Strengthening the Reporting of Observational Studies in Epidemiology (STROBE),<sup>1</sup> and Enhancing the QUALity and Transparency Of health Research (EQUATOR) guidelines.<sup>2</sup> The study protocol was designed by the investigators at the Neuroscience Institute of Geisinger Health System, Pennsylvania, USA, and received approval by the Institutional Review Board of Geisinger Health System and other participating institutions when it was required. Investigators from North America (Canada, Mexico, and six states of the United States), South America (Brazil), Europe (Belgium, Croatia, Czech Republic, Finland, France, Germany, Greece, Ireland, Italy, Norway, Portugal, Spain, Sweden, and Switzerland), Asia and the Middle East (India, Iran, Iraq, Israel, Lebanon, Singapore, South Korea, Turkey, and the United Arab Emirate), Oceania (Australia and New Zealand), and Africa (Egypt, Nigeria, and Uganda) responded to our invitation. The centers were included by non-probability sampling and data were recruited until June 10th, 2020. The core investigators invited their existing networks and collaborators from several countries through phone calls, emails, and announcements on social media platforms for professionals. The investigators and collaborators further introduced the study to local societies for physicians, academic health systems, hospitals that were designated as COVID-19 centers, services in charge of stroke patients, and other related organizations, sometimes using local languages. The authors also invited many stroke clinic investigators in other affected countries. In the USA, our collaborators from seven health systems accepted our invitation. Tertiary centers from health systems in New York, Pennsylvania, Tennessee, North Carolina, Virginia, and California provided data. In New Zealand, the data collection was led by the National Stroke Register team, which is supported by the National Stroke Network and the New Zealand Ministry of Health. Stroke physicians from all districts (Auckland, Bay of Plenty, Canterbury, Capital and Coast, Counties Manukau, Hawke's Bay, Lakes, Mid Central, Nelson Marlborough, Northland District, South Canterbury, Southern, Tairāwhiti, Taranaki, Waikato, Waitemata, West Coast, Wairarapa, Whanganui, and Hutt Valley) further verified the stroke events. In Iran, we communicated with the Departments of Neurology and Neurosurgery in main university hospitals according to the ranking by the Iranian Ministry of Health and Medical Education, geographical location, and whether the center was located in the SARS-CoV-2 infection hot spots. The local investigators further announced the invitation through the Iranian Stroke Organization and the National Society for Neurologist portals. We received data from 16 provinces (Tehran, East Azerbaijan, Khorasan, Guilan, Ardabil, Isfahan, Golestan, Kermanshah, Semnan, Hormozgan, Kerman, Lorestan, Khuzestan, Markazi, Fars, and Ghazvin). In India, detailed data regarding the stroke were obtained from four states (Karnataka, Chhattisgarh, Ladakh, and Uttar Khand). Data from all Karnataka districts (Bengaluru, Mysuru, Belagavi, Kalaburgi, Vijayapura,

Chikkaballapur, Bagalkote, Bidar, and Dakshina-Kannada) were obtained from the Government of Karnataka, Department of Health and Family Welfare in Bengaluru. Records of stroke were rechecked with Stroke Registry in Karnataka and individual communications with 15 tertiary centers in Bengaluru. In Lebanon, two health systems in Beirut, where over 75% of patients with SARS-CoV-2 diagnosis were hospitalized, participated in this study. In Italy, data from Sicily were provided by the Regional Health Authority of Sicily. We also received data from Genova. Multiple centers in Switzerland (Lugano, and Basel), Israel (Jerusalem), Portugal (Porto, Coimbra, and Lisbon), Spain (Valladolid, Barcelona, Lleida, and Seville), Greece (Athens), Germany (Frankfurt, and Bochum), France (Paris), Croatia (Zagreb), Brazil (São Paulo), Turkey (Istanbul), Finland (Helsinki), South Korea (Seoul), Australia (Adelaide, Melbourne, and Sydney), Uganda (Kampala), Egypt (Cairo) collaborated in this study. Collaborators from the United Arab Emirates (Abu Dhabi) could not provide data by the deadline. Several centers reported no eligible patients for this study. Centers in Brazil, Canada, Croatia, Egypt, France, Germany, Greece, Iran, Israel, Italy, Portugal, Republic of Korea, Singapore, Spain, Switzerland, Turkey, and the United States reported data on their patients for the purpose of this study.



**Supplemental Table I.** Annual country health expenditures per capita during 2010 – 2017, according to WHO Health Expenditure reports. These countries provided reports of stroke among SARS-CoV-2 infected patients.

| Countries                | Current Health Expenditure (CHE) per Capita in US\$ |            |            |            |             |            |            |             |
|--------------------------|-----------------------------------------------------|------------|------------|------------|-------------|------------|------------|-------------|
|                          | 2010                                                | 2011       | 2012       | 2013       | 2014        | 2015       | 2016       | 2017        |
| United States of America | \$7,957.28                                          | \$8,169.91 | \$8,441.00 | \$8,647.64 | \$9,068.00  | \$9,538.07 | \$9,941.35 | \$10,246.14 |
| Switzerland              | \$8,021.81                                          | \$9,572.17 | \$9,286.55 | \$9,689.67 | \$10,014.71 | \$9,807.80 | \$9,835.96 | \$9,956.26  |
| Germany                  | \$4,597.24                                          | \$5,021.63 | \$4,754.66 | \$5,094.42 | \$5,290.72  | \$4,617.49 | \$4,734.18 | \$5,033.45  |
| Canada                   | \$5,044.14                                          | \$5,361.24 | \$5,408.93 | \$5,345.32 | \$5,081.56  | \$4,539.14 | \$4,518.14 | \$4,754.95  |
| France                   | \$4,593.39                                          | \$4,933.40 | \$4,652.29 | \$4,900.39 | \$4,987.87  | \$4,204.09 | \$4,256.96 | \$4,379.73  |
| Israel                   | \$2,211.02                                          | \$2,410.75 | \$2,376.65 | \$2,648.82 | \$2,788.50  | \$2,640.31 | \$2,856.18 | \$3,144.63  |
| Italy                    | \$3,214.55                                          | \$3,387.58 | \$3,125.61 | \$3,195.55 | \$3,190.09  | \$2,708.84 | \$2,736.26 | \$2,840.13  |
| Singapore                | \$1,513.57                                          | \$1,704.37 | \$1,863.08 | \$2,114.62 | \$2,237.40  | \$2,326.27 | \$2,489.91 | \$2,618.71  |
| Spain                    | \$2,775.14                                          | \$2,894.76 | \$2,588.67 | \$2,628.86 | \$2,671.28  | \$2,351.53 | \$2,390.63 | \$2,506.46  |
| Republic of Korea        | \$1,374.27                                          | \$1,521.49 | \$1,575.86 | \$1,712.08 | \$1,910.74  | \$1,925.47 | \$2,040.41 | \$2,283.07  |
| Portugal                 | \$2,213.10                                          | \$2,207.70 | \$1,918.60 | \$1,959.42 | \$1,986.89  | \$1,724.53 | \$1,802.77 | \$1,908.03  |
| Greece                   | \$2,573.74                                          | \$2,354.01 | \$1,968.48 | \$1,834.34 | \$1,724.53  | \$1,464.73 | \$1,499.35 | \$1,516.59  |
| Brazil                   | \$891.76                                            | \$1,025.49 | \$950.93   | \$974.50   | \$1,009.83  | \$776.15   | \$795.66   | \$928.80    |
| Croatia                  | \$1,126.37                                          | \$1,132.50 | \$1,029.97 | \$889.94   | \$909.37    | \$795.52   | \$840.91   | \$902.14    |
| Iran                     | \$440.85                                            | \$524.69   | \$519.30   | \$413.73   | \$382.71    | \$375.13   | \$454.19   | \$475.48    |
| Turkey                   | \$539.33                                            | \$531.66   | \$524.82   | \$552.41   | \$527.20    | \$454.61   | \$468.65   | \$444.65    |
| Egypt                    | \$111.44                                            | \$123.26   | \$143.38   | \$140.33   | \$153.79    | \$180.82   | \$151.47   | \$105.77    |

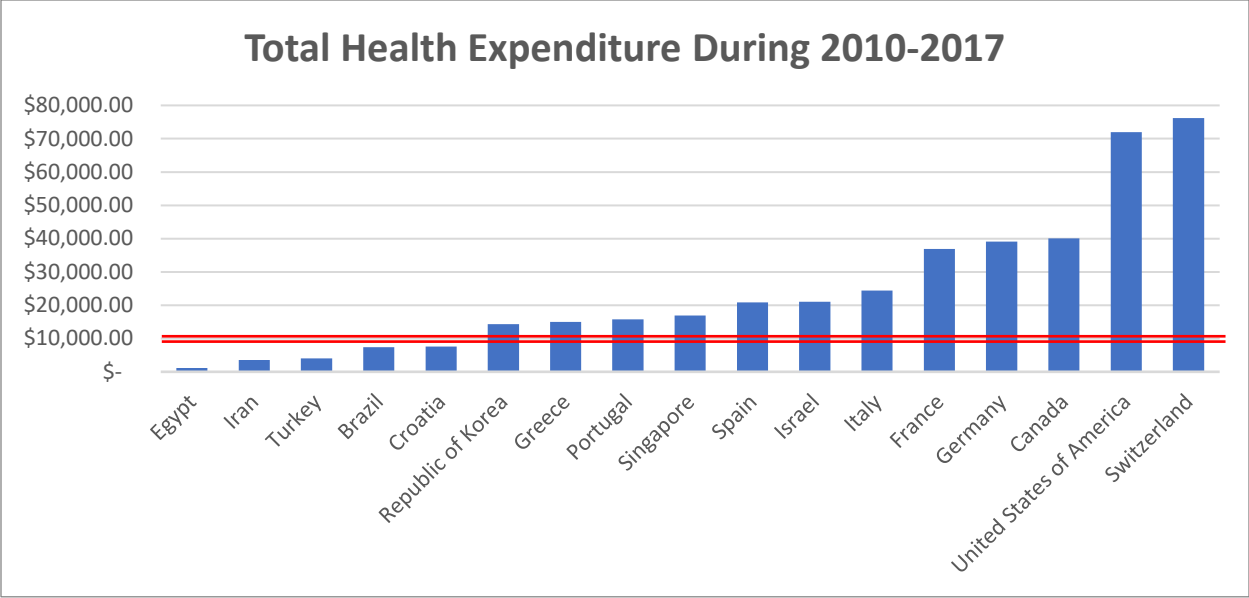

**Supplemental Figure I.** Distribution of total health expenditures per capita during 2010-2017 by country, according to WHO Health Expenditure. These countries provided reports of stroke among SARS-CoV-2 infected patients.

# RESULTS

## Results; Supplemental Table II. Subgroups of AIS patients based on geographical regions

Baseline characteristics, comorbidities, and laboratory findings among SARS-CoV-2 patients with an acute ischemic stroke, according to geographical regions. **Blue ink indicates the post-hoc p values.**

| Parameter                                                              | A: Middle East<br>N = 153 (47.4%)  | B: Asia<br>N = 6 (1.9%)                              | C: America<br>N = 88 (27.2%) | D: Europe<br>N = 76 (23.5%)                                | P-value |
|------------------------------------------------------------------------|------------------------------------|------------------------------------------------------|------------------------------|------------------------------------------------------------|---------|
| Age; Mean (SD); Years                                                  | 67 ± 15                            | 54 ± 20                                              | 68 ± 14                      | 68 ± 16                                                    | 0.19    |
| Age; Median [IQR]; Years                                               | 68 [58 – 78]                       | 48 [39 – 75]                                         | 66 [59 – 79]                 | 70 [58 – 80]                                               | 0.39    |
| Sex; Female; N (%)                                                     | 58 (37.9)                          | 1 (16.7)                                             | 38 (43.2)                    | 33 (43.4)                                                  | 0.50    |
| Large Vessel Occlusion; N (%)                                          | 71 (48.3)                          | 2 (40.0)                                             | 23 (41.1)                    | 30 (40.0)                                                  | 0.62    |
| Intravenous Thrombolysis; N (%)                                        | 22 (14.4)                          | 1 (16.7)                                             | 11 (12.5)                    | 10 (13.2)                                                  | 0.97    |
| Mechanical Thrombectomy; N (%)                                         | 4 (2.6)                            | 0 (0.0)                                              | 4 (4.5)                      | 16 (21.1) <sup>A (&lt;0.001)</sup><br><sub>C (0.004)</sub> | <0.001  |
| National Institutes of Health Stroke Scale (NIHSS) Score; Median [IQR] | 12.0 [6.0 – 17.0]                  | 7.0 [5.0 – 11.0]                                     | 7.0 [0.0 – 16.0]             | 8.0 [4.0 – 18.0]                                           | 0.06    |
| <b>Imaging Patterns</b>                                                |                                    |                                                      |                              |                                                            |         |
| Embolic/Large Vessel athero-Thromboembolism; N (%)                     | 107 (75.4)                         | 5 (83.3)                                             | 29 (87.9)                    | 65 (86.7)                                                  | 0.05    |
| Lacune; N (%)                                                          | 16 (11.3)                          | 0 (0.0)                                              | 3 (9.1)                      | 7 (9.3)                                                    |         |
| Border-zone; N (%)                                                     | 19 (13.4)                          | 1 (16.7)                                             | 0 (0.0)                      | 3 (4.0)                                                    |         |
| Vasculitis Pattern; N (%)                                              | 0 (0.0)                            | 0 (0.0)                                              | 1 (3.0)                      | 0 (0.0)                                                    |         |
| <b>TOAST</b>                                                           |                                    |                                                      |                              |                                                            |         |
| Large-Artery Atherosclerosis; N (%)                                    | 38 (53.5) <sup>D (&lt;0.001)</sup> | 2 (33.3)                                             | 5 (26.3)                     | 11 (14.9)                                                  | <0.001  |
| Cardio-embolism; N (%)                                                 | 15 (21.1)                          | 1 (16.7)                                             | 3 (15.8)                     | 27 (36.5)                                                  |         |
| Small-Vessel Occlusion; N (%)                                          | 12 (18.3) <sup>D (0.02)</sup>      | 0 (0.0)                                              | 1 (5.3)                      | 3 (4.1)                                                    |         |
| Stroke of Other Determined Etiology; N (%)                             | 5 (7.0)                            | 0 (0.0)                                              | 2 (10.5)                     | 6 (8.1)                                                    |         |
| Stroke of Undetermined Etiology; N (%)                                 | 0 (0.0)                            | 3 (50.0)                                             | 8 (42.1)                     | 27 (36.5)                                                  |         |
| Interval Between Onset to Index Event; Median [IQR]; Days              | 3.0 [0.0 – 8.0]                    | 5.0 [4.0 – 6.0]                                      | 2.0 [0.0 – 7.0]              | 4.0 [0.0 – 14.0]                                           | 0.14    |
| Mechanical Ventilation; N (%)                                          | 47 (30.7)                          | 1 (16.7)                                             | 15 (17.0)                    | 22 (28.9)                                                  | 0.11    |
| <b>Disposition*</b>                                                    |                                    |                                                      |                              |                                                            |         |
| Discharged Home; N (%)                                                 | 74 (48.4)                          | 0.0 (0.0)                                            | 28 (45.2)                    | 25 (32.9)                                                  | <0.001  |
| In Hospital Mortality; N (%)                                           | 46 (30.1)                          | 1 (16.7)                                             | 16 (25.8)                    | 19 (25.0)                                                  |         |
| Still in Hospital/Subacute Care; N (%)                                 | 33 (21.6)                          | 5 (83.3) <sup>A (0.003)</sup><br><sub>C (0.04)</sub> | 18 (29.0)                    | 32 (42.1) <sup>A (0.007)</sup>                             |         |

| Parameter                                                | A: Middle East<br>N = 153 (47.4%)          | B: Asia<br>N = 6 (1.9%) | C: America<br>N = 88 (27.2%) | D: Europe<br>N = 76 (23.5%) | P-value |
|----------------------------------------------------------|--------------------------------------------|-------------------------|------------------------------|-----------------------------|---------|
| Length of Hospital Stay; Median (IQR); Days              | 6.0 [4.0 – 10.0]<br>C (0.047)<br>D (0.047) | 12.0 [12.0 – 14.0]      | 9.0 [4.0 – 14.0]             | 11.0 [5.0 – 18.0]           | 0.04    |
| Comorbidities                                            |                                            |                         |                              |                             |         |
| Hypertension; N (%)                                      | 93 (60.8)                                  | 2 (33.3)                | 56 (65.9)                    | 51 (67.1)                   | 0.33    |
| Diabetes Mellitus; N (%)                                 | 53 (34.6)                                  | 1 (16.7)                | 34 (39.5)                    | 23 (30.3)                   | 0.50    |
| Ischemic Heart Disease; N (%)                            | 50 (32.7) C (0.02)<br>D (0.04)             | 0 (0.0)                 | 9 (14.8)                     | 13 (17.1)                   | 0.01    |
| Atrial Fibrillation; N (%)                               | 20 (13.1)                                  | 0 (0.0)                 | 9 (10.6)                     | 16 (21.1)                   | 0.17    |
| Carotid Stenosis; N (%)                                  | 17 (11.1)                                  | 0 (0.0)                 | 7 (11.5)                     | 14 (18.4)                   | 0.32    |
| Chronic Kidney Disease; N (%)                            | 30 (19.6) C (0.01)                         | 0 (0.0)                 | 5 (5.9)                      | 7 (9.2)                     | 0.01    |
| Cardiac Ejection Fraction <40%; N (%)                    | 6 (3.9)                                    | 1 (16.7)                | 7 (11.5)                     | 10 (13.2)                   | 0.05    |
| Active Neoplasm; N (%)                                   | 12 (7.8)                                   | 0 (0.0)                 | 5 (8.2)                      | 4 (5.3)                     | 0.78    |
| Rheumatological Disease; N (%)                           | 0 (0.0)                                    | 0 (0.0)                 | 0 (0.0)                      | 5 (6.6)                     | <0.001  |
| Prior Stroke or Transient Ischemic Attack; N (%)         | 2 (1.3)                                    | 0 (0.0)                 | 2 (3.3)                      | 1 (1.3)                     | 0.75    |
| Smoking; N (%)                                           | 28 (18.3)                                  | 0 (0.0)                 | 16 (8.8)                     | 9 (11.8)                    | 0.38    |
| Laboratory Findings                                      |                                            |                         |                              |                             |         |
| White Blood Cell Count x10 <sup>9</sup> /L; Mean (SD)    | 10.3 ± 4.5                                 | 7.2 ± 3.2               | 9.0 ± 4.1                    | 10.1 ± 5.9                  | 0.15    |
| White Blood Cell Count x10 <sup>9</sup> /L; Median [IQR] | 9.6 [7.5 – 11.8]                           | 6.3 [4.4 – 10.2]        | 7.9 [6.2 – 10.5]             | 8.5 [6.2 – 11.5]            | 0.02    |
| Neutrophil Count x10 <sup>9</sup> /L; Mean (SD)          | 8.2 ± 4.3                                  | 4.4 ± 2.6               | 7.2 ± 4.2                    | 7.6 ± 5.0                   | 0.11    |
| Neutrophil Count x10 <sup>9</sup> /L; Median [IQR]       | 7.6 [5.4 – 9.9]                            | 3.7 [2.5 – 5.3]         | 6.3 [4.2 – 8.2]              | 6.0 [4.2 – 8.8]             | 0.01    |
| Lymphocyte Count x10 <sup>9</sup> /L; Mean (SD)          | 1.5 ± 1.0                                  | 1.7 ± 0.5               | 1.6 ± 2.1                    | 2.2 ± 2.2                   | 0.05    |
| Lymphocyte x10 <sup>9</sup> /L; Median [IQR]             | 1.3 [0.9 – 1.9]                            | 1.6 [1.4 – 1.7]         | 1.2 [0.9 – 1.8]              | 1.4 [0.9 – 2.5]             | 0.14    |
| Platelet Count x10 <sup>9</sup> /L; Mean (SD)            | 230.5 ± 112.5<br>D (<0.001)                | 200.5 ± 86.8            | 295.6 ± 138.3<br>D (0.017)   | 506.0 ± 835.8               | <0.001  |
| Platelet Count x10 <sup>9</sup> /L; Median [IQR]         | 192.0 [145.0 – 305.0]<br>C (0.039)         | 181.5 [127.0 – 241.0]   | 268.0 [202.0 – 381.0]        | 244.5 [177.0 – 397.5]       | <0.001  |
| Alanine Transaminase (ALT); Mean (SD); U/L               | 59.7 ± 70.9                                | 60.6 ± 70.5             | 78.1 ± 109.9                 | 57.2 ± 91.3                 | 0.50    |
| Alanine Transaminase (ALT); Median [IQR] ; U/L           | 33.0 [9.0 – 97.0]                          | 26.0 [11.0 – 113.4]     | 42.3 [16.2 – 102.0]          | 20.5 [3.1 – 57.5]           | 0.21    |
| Aspartate Transaminase (AST); Mean (SD); U/L             | 34.1 ± 29.4                                | 23.7 ± 14.3             | 30.9 ± 21.0                  | 30.4 ± 27.5                 | 0.62    |
| Aspartate Transaminase (AST); Median [IQR] ; U/L         | 23.0 [14.6 – 43.0]                         | 23.5 [14.2 – 34.0]      | 23.5 [15.0 – 40.0]           | 25.6 [7.7 – 40.0]           | 0.70    |
| Blood Urea Nitrogen (BUN); Mean (SD); mg/dl              | 50.0 ± 49.0                                | 101.7 ± 118.7           | 79.6 ± 188.3                 | 38.9 ± 27.6                 | 0.05    |

| Parameter                                      | A: Middle East<br>N = 153 (47.4%)             | B: Asia<br>N = 6 (1.9%)            | C: America<br>N = 88 (27.2%) | D: Europe<br>N = 76 (23.5%) | P-value |
|------------------------------------------------|-----------------------------------------------|------------------------------------|------------------------------|-----------------------------|---------|
| Blood Urea Nitrogen (BUN); Median [IQR]; mg/dl | 30.0 [20.0 – 46.0]                            | 60.0 [35.0 – 86.0]                 | 35.0 [21.0 – 67.0]           | 33.0 [23.0 – 46.0]          | 0.14    |
| Creatinine; Mean (SD); mg/dl                   | 1.51 ± 1.3                                    | 1.4 ± 0.9                          | 1.9 ± 2.8                    | 1.1 ± 0.6                   | 0.04    |
| Creatinine; Median [IQR]; mg/dl                | 1.12 [0.9 – 1.5]                              | 1.0 [1.0 – 1.4]                    | 1.1 [0.8 – 2.3]              | 1.0 [0.8 – 1.3]             | 0.06    |
| C-Reactive Protein (CRP); Mean (SD); mg/L      | 50.0 ± 60.0                                   | 118.0 ± 138.0                      | 98.0 ± 239.0                 | 40.0 ± 24.0                 | 0.02    |
| C-Reactive Protein (CRP); Median [IQR]; mg/L   | 33.0 [24.0 – 49.0]                            | 72.0 [45.0 – 94.0]                 | 43.0 [24.0 – 82.0]           | 36.0 [24.0 – 50.0]          | 0.10    |
| Lactate Dehydrogenase (LDH); Mean (SD); U/L    | 462.4 ± 186.8                                 | 541.5 ± 185.8                      | 432.1 ± 278.6                | 911.6 ± 2623.2              | 0.40    |
| Lactate Dehydrogenase (LDH); Median [IQR]; U/L | 426.5 [331.5 – 558.5]<br>D (0.006)            | 504.0 [419.0 – 648.0]<br>D (0.008) | 384.0 [266.0 – 536.0]        | 270.0 [197.0 – 426.0]       | 0.03    |
| Fibrinogen; Mean (SD); mg/dl                   | 459.6 ± 759.0                                 | 43.5 ± 58.8                        | 421.9 ± 214.8                | 560.3 ± 1377.8              | 0.70    |
| Fibrinogen; Median [IQR]; mg/dl                | 166.8 [2.2 – 403.0]<br>C (0.043)<br>D (0.039) | 23.0 [3.5 – 53.9]<br>C (0.037)     | 464.0 [216.5 – 578.5]        | 210.0 [3.8 – 456.0]         | 0.01    |
| D- Dimer; Mean (SD); ng/ml                     | 1356.6 ± 3084.7                               | 560.0 ± 265.5                      | 4430.7 ± 9768.1              | 1659.8 ± 1167.4             | 0.09    |
| D- Dimer; Median [IQR]; ng/ml                  | 584.0 [427.0 – 1100.0]                        | 550.0 [400.0 – 650.0]              | 1060.0 [565.0 – 2867.0]      | 1431.0 [730.0 – 2200.0]     | 0.01    |

\* Data on patients' disposition were sparse.

## Results; Supplemental Table III. Subgroups of AIS patients according to the countries' health expenditure

Baseline characteristics, comorbidities, and laboratory findings among SARS-CoV-2 patients with an acute ischemic stroke, based on the countries' health expenditures. **Blue ink indicates the post-hoc p values.**

| Parameter                                                              | Middle to high health expenditure<br>N = 170 (52.6%) | Low health expenditure<br>N = 153 (47.4%) | P-value |
|------------------------------------------------------------------------|------------------------------------------------------|-------------------------------------------|---------|
| Age; Mean (SD); Years                                                  | 68 ± 15                                              | 67 ± 15                                   | 0.65    |
| Age; Median [IQR]; Years                                               | 69 [58 – 79]                                         | 68 [58 – 77]                              | 0.83    |
| Sex; Female; N (%)                                                     | 74 (43.5)                                            | 56 (36.6)                                 | 0.21    |
| Large Vessel Occlusion; N (%)                                          | 53 (39.0)                                            | 73 (49.7)                                 | 0.07    |
| Intravenous Thrombolysis; N (%)                                        | 21 (12.4)                                            | 23 (15.0)                                 | 0.48    |
| Mechanical Thrombectomy; N (%)                                         | 21 (12.4)                                            | 3 (2.0)                                   | <0.001  |
| National Institutes of Health Stroke Scale (NIHSS) Score; Median [IQR] | 8.0 [3.0 – 17.0]                                     | 11.0 [5.0 – 17.0]                         | 0.02    |
| Imaging Patterns                                                       |                                                      |                                           |         |
| Embollic/Large Vessel athero-Thromboembolism; N (%)                    | 100 (87.0) <sup>B (0.02)</sup>                       | 106 (75.2)                                | 0.02    |
| Lacune; N (%)                                                          | 10 (8.7)                                             | 16 (11.3)                                 |         |
| Border-zone; N (%)                                                     | 4 (3.5)                                              | 19 (13.5) <sup>A (0.01)</sup>             |         |
| Vasculitis Pattern; N (%)                                              | 1 (0.9)                                              | 0 (0.0)                                   |         |
| TOAST                                                                  |                                                      |                                           |         |
| Large-Artery Atherosclerosis; N (%)                                    | 19 (19.2)                                            | 37 (52.1) <sup>A (&lt;0.001)</sup>        | <0.001  |
| Cardio-embolism; N (%)                                                 | 31 (31.3)                                            | 15 (21.1)                                 |         |
| Small-Vessel Occlusion; N (%)                                          | 4 (4.0)                                              | 13 (18.3) <sup>A (0.002)</sup>            |         |
| Stroke of Other Determined Etiology; N (%)                             | 8 (8.1)                                              | 5 (7.0)                                   |         |
| Stroke of Undetermined Etiology; N (%)                                 | 37 (37.4) <sup>B (&lt;0.001)</sup>                   | 1 (1.4)                                   |         |
| Interval Between Onset to Index Event; Median [IQR]; Days              | 3.0 [0.0 – 10.0]                                     | 3.0 [0.0 – 8.0]                           | 0.69    |
| Mechanical Ventilation; N (%)                                          | 38 (22.4)                                            | 47 (30.7)                                 | 0.09    |
| Disposition*                                                           |                                                      |                                           |         |
| Discharged Home; N (%)                                                 | 54 (37.5)                                            | 73 (47.7)                                 | 0.01    |
| In Hospital Mortality; N (%)                                           | 35 (24.3)                                            | 47 (30.7)                                 |         |
| Still in Hospital/Subacute Care; N (%)                                 | 55 (38.2) <sup>B (0.002)</sup>                       | 33 (21.6)                                 |         |
| Length of Hospital Stay; Median (IQR); Days                            | 10.0 [5.0 – 17.0]                                    | 6.0 [4.0 – 10.0]                          | 0.14    |
| Comorbidities                                                          |                                                      |                                           |         |
| Hypertension; N (%)                                                    | 109 (65.3)                                           | 93 (60.8)                                 | 0.41    |
| Diabetes Mellitus; N (%)                                               | 59 (35.1)                                            | 52 (34.0)                                 | 0.83    |
| Ischemic Heart Disease; N (%)                                          | 22 (15.4)                                            | 50 (32.7)                                 | <0.001  |

| Parameter                                                | Middle to high health expenditure<br>N = 170 (52.6%) | Low health expenditure<br>N = 153 (47.4%) | P-value |
|----------------------------------------------------------|------------------------------------------------------|-------------------------------------------|---------|
| Atrial Fibrillation; N (%)                               | 25 (15.0)                                            | 20 (13.1)                                 | 0.63    |
| Carotid Stenosis; N (%)                                  | 19 (13.3)                                            | 19 (12.4)                                 | 0.82    |
| Chronic Kidney Disease; N (%)                            | 11 (6.6)                                             | 21 (20.3)                                 | <0.001  |
| Cardiac Ejection Fraction <40%; N (%)                    | 18 (12.6)                                            | 6 (3.9)                                   | 0.01    |
| Active Neoplasm; N (%)                                   | 8 (5.6)                                              | 13 (8.5)                                  | 0.33    |
| Rheumatological Disease; N (%)                           | 4 (2.8)                                              | 1 (0.7)                                   | 0.15    |
| Prior Stroke or Transient Ischemic Attack; N (%)         | 3 (2.1)                                              | 2 (1.3)                                   | 0.60    |
| Smoking; N (%)                                           | 23 (13.8)                                            | 30 (19.6)                                 | 0.16    |
| <b>Laboratory Findings</b>                               |                                                      |                                           |         |
| White Blood Cell Count x10 <sup>9</sup> /L; Mean (SD)    | 9.6 ± 5.0                                            | 10.1 ± 4.6                                | 0.30    |
| White Blood Cell Count x10 <sup>9</sup> /L; Median [IQR] | 8.2 [6.2 – 10.8]                                     | 9.5 [7.4 – 11.8]                          | 0.02    |
| Neutrophil Count x10 <sup>9</sup> /L; Mean (SD)          | 7.3 ± 4.6                                            | 8.2 ± 4.3                                 | 0.11    |
| Neutrophil Count x10 <sup>9</sup> /L; Median [IQR]       | 6.2 [4.2 – 8.7]                                      | 7.5 [5.3 -9.9]                            | <0.001  |
| Lymphocyte Count x10 <sup>9</sup> /L; Mean (SD)          | 1.9 ± 2.2                                            | 1.5 ± 1.0                                 | 0.09    |
| Lymphocyte x10 <sup>9</sup> /L; Median [IQR]             | 1.3 [0.9 – 2.0]                                      | 1.3 [1.0 – 1.9]                           | 1.00    |
| Platelet Count x10 <sup>9</sup> /L; Mean (SD)            | 393.4 ± 591.6                                        | 229.0 ± 110.6                             | <0.001  |
| Platelet Count x10 <sup>9</sup> /L; Median [IQR]         | 247.0 [183.0 – 386.0]                                | 191.0 [145.0 – 298.5]                     | <0.001  |
| Alanine Transaminase (ALT); Mean (SD); U/L               | 65.8 ± 99.9                                          | 60.9 ± 70.6                               | 0.65    |
| Alanine Transaminase (ALT); Median [IQR]; U/L            | 26.9 [8.6 – 76.5]                                    | 40.0 [10.4 – 98.0]                        | 0.46    |
| Aspartate Transaminase (AST); Mean (SD); U/L             | 31.3 ± 24.0                                          | 33.0 ± 29.6                               | 0.60    |
| Aspartate Transaminase (AST); Median [IQR]; U/L          | 27.0 [14.0 – 40.0]                                   | 21.4 [14.0 – 39.0]                        | 0.62    |
| Blood Urea Nitrogen (BUN); Mean (SD); mg/dl              | 61.4 ± 135.2                                         | 43.5 ± 47.9                               | 0.14    |
| Blood Urea Nitrogen (BUN); Median [IQR]; mg/dl           | 33.0 [22.0 – 53.0]                                   | 32.0 [20.0 – 46.0]                        | 0.35    |
| Creatinine; Mean (SD); mg/dl                             | 1.52 ± 2.0                                           | 1.5 ± 1.3                                 | 0.95    |
| Creatinine; Median [IQR]; mg/dl                          | 1.0 [0.8 – 1.4]                                      | 1.1 [0.9 – 1.5]                           | 0.07    |
| C-Reactive Protein (CRP); Mean (SD); mg/L                | 71.0 ± 170.0                                         | 50.0 ± 60.0                               | 0.18    |
| C-Reactive Protein (CRP); Median [IQR]; mg/L             | 39.0 [24.0 – 66.0]                                   | 33.0 [25.0 – 48.0]                        | 0.11    |
| Lactate Dehydrogenase (LDH); Mean (SD); U/L              | 667.0 ± 1861.5                                       | 473.8 ± 187.3                             | 0.50    |
| Lactate Dehydrogenase (LDH); Median [IQR]; U/L           | 346.0 [205.0 – 522.0]                                | 438.0 [336.0 – 600.0]                     | 0.01    |
| Fibrinogen; Mean (SD); mg/dl                             | 514.4 ± 1061.6                                       | 171.7 ± 216.9                             | 0.27    |
| Fibrinogen; Median [IQR]; mg/dl                          | 328.0 [53.9 – 506.0]                                 | 2.47 [2.1 – 373.0]                        | 0.02    |
| D- Dimer; Mean (SD); ng/ml                               | 2879.1 ± 6884.8                                      | 1522.9 ± 3156.3                           | 0.38    |
| D- Dimer; Median [IQR]; ng/ml                            | 1060.0 [585.0 – 2235.0]                              | 600.0 [462.0 – 1100.0]                    | 0.05    |

\* Data on patients' disposition were sparse.



## Results; Supplemental Table IV. Subgroups of AIS patients based on sex.

Baseline characteristics, comorbidities, and laboratory findings among SARS-CoV-2 patients with an acute ischemic stroke among female versus male patients. [Blue ink indicates the post-hoc p values.](#)

| Parameter                                                              | Female<br>N = 130 (40.2%)    | Male<br>N = 193 (59.8%) | P-value |
|------------------------------------------------------------------------|------------------------------|-------------------------|---------|
| Age; Mean (SD); Years                                                  | 68.8 ± 17.1                  | 66.1 ± 13.7             | 0.13    |
| Age; Median [IQR]; Years                                               | 73 [58 – 81]                 | 66 [58 – 76]            | 0.14    |
| Large Vessel Occlusion; N (%)                                          | 46 (39.3)                    | 80 (48.2)               | 0.14    |
| Intravenous Thrombolysis; N (%)                                        | 22 (16.9)                    | 22 (11.4)               | 0.16    |
| Mechanical Thrombectomy; N (%)                                         | 12 (9.2)                     | 12 (6.2)                | 0.31    |
| National Institutes of Health Stroke Scale (NIHSS) Score; Median [IQR] | 12.0 [5.0 – 19.0]            | 8.0 [4.0 – 16.0]        | <0.001  |
| Imaging Patterns                                                       |                              |                         |         |
| Embolc/Large Vessel athero-Thromboembolism; N (%)                      | 83 (81.4)                    | 123 (79.9)              | 0.49    |
| Lacune; N (%)                                                          | 11 (10.8)                    | 15 (9.7)                |         |
| Border-zone; N (%)                                                     | 7 (6.9)                      | 16 (10.4)               |         |
| Vasculitis Pattern; N (%)                                              | 1 (1.0)                      | 0 (0.0)                 |         |
| TOAST                                                                  |                              |                         |         |
| Large-Artery Atherosclerosis; N (%)                                    | 19 (28.4)                    | 27 (35.9)               | 0.05    |
| Cardio-embolism; N (%)                                                 | 21 (31.3)                    | 25 (24.3)               |         |
| Small-Vessel Occlusion; N (%)                                          | 3 (4.5)                      | 14 (13.6)               |         |
| Stroke of Other Determined Etiology; N (%)                             | 9 (13.4) <sup>B (0.02)</sup> | 4 (3.9)                 |         |
| Stroke of Undetermined Etiology; N (%)                                 | 15 (22.4)                    | 23 (22.3)               |         |
| Interval Between Onset to Index Event; Median [IQR]; Days              | 1.0 [0 – 8.0]                | 4.0 [0 – 9.0]           | 0.55    |
| Mechanical Ventilation; N (%)                                          | 35 (26.9)                    | 50 (25.9)               | 0.84    |
| Disposition*                                                           |                              |                         |         |
| Discharged Home; N (%)                                                 | 47 (39.2)                    | 80 (45.2)               | 0.59    |
| In Hospital Mortality; N (%)                                           | 35 (29.2)                    | 47 (26.6)               |         |
| Still in Hospital/Subacute Care; N (%)                                 | 38 (31.7)                    | 50 (28.2)               |         |
| Length of Hospital Stay; Median (IQR); Days                            | 7.0 [4.0 – 17.0]             | 7.0 [4.0 – 15.0]        | 0.10    |
| Comorbidities                                                          |                              |                         |         |
| Hypertension; N (%)                                                    | 80 (63.0)                    | 122 (63.2)              | 0.97    |
| Diabetes Mellitus; N (%)                                               | 46 (35.9)                    | 65 (33.7)               | 0.68    |
| Ischemic Heart Disease; N (%)                                          | 28 (23.9)                    | 44 (24.6)               | 0.90    |
| Atrial Fibrillation; N (%)                                             | 22 (17.3)                    | 23 (11.9)               | 0.17    |
| Carotid Stenosis; N (%)                                                | 14 (12.0)                    | 24 (13.4)               | 0.72    |
| Chronic Kidney Disease; N (%)                                          | 10 (7.9)                     | 32 (16.6)               | 0.02    |
| Cardiac Ejection Fraction <40%; N (%)                                  | 12 (11.1)                    | 11 (6.1)                | 0.13    |

| Parameter                                                | Female<br>N = 130 (40.2%) | Male<br>N = 193 (59.8%) | P-value |
|----------------------------------------------------------|---------------------------|-------------------------|---------|
| Active Neoplasm; N (%)                                   | 7 (6.0)                   | 14 (6.8)                | 0.55    |
| Rheumatological Disease; N (%)                           | 1 (0.9)                   | 4 (2.2)                 | 0.37    |
| Prior Stroke or Transient Ischemic Attack; N (%)         | 2 (1.7)                   | 3 (1.7)                 | 0.98    |
| Smoking; N (%)                                           | 12 (9.4)                  | 41 (21.2)               | 0.01    |
| Laboratory Findings                                      |                           |                         |         |
| White Blood Cell Count x10 <sup>9</sup> /L; Mean (SD)    | 9.7 ± 5.0                 | 9.9 ± 4.7               | 0.80    |
| White Blood Cell Count x10 <sup>9</sup> /L; Median [IQR] | 8.8 [6.5 – 10.8]          | 9.1 [7.2 – 11.6]        | 0.64    |
| Neutrophil Count x10 <sup>9</sup> /L; Mean (SD)          | 7.7 ± 4.9                 | 7.7 ± 4.2               | 0.94    |
| Neutrophil Count x10 <sup>9</sup> /L; Median [IQR]       | 6.3 [4.6 – 9.2]           | 7.2 [4.9 – 9.4]         | 0.94    |
| Lymphocyte Count x10 <sup>9</sup> /L; Mean (SD)          | 1.6 ± 0.8                 | 1.7 ± 2.1               | 0.64    |
| Lymphocyte x10 <sup>9</sup> /L; Median [IQR]             | 1.5 [1.0 – 2.2]           | 1.3 [0.9 – 1.8]         | 0.24    |
| Platelet Count x10 <sup>9</sup> /L; Mean (SD)            | 284.9 ± 199.0             | 334.6 ± 546.7           | 0.35    |
| Platelet Count x10 <sup>9</sup> /L; Median [IQR]         | 242.0 [162.0 – 353.0]     | 221.0 [161.0 – 313.0]   | 0.90    |
| Alanine Transaminase (ALT); Mean (SD); U/L               | 47.4 ± 55.5               | 73.6 ± 100.2            | 0.01    |
| Alanine Transaminase (ALT); Median [IQR] ; U/L           | 22.4 [4.0 – 74.0]         | 33.0 [12.3 – 109.0]     | 0.05    |
| Aspartate Transaminase (AST); Mean (SD); U/L             | 32.1 ± 25.5               | 32.1 ± 27.7             | 0.98    |
| Aspartate Transaminase (AST); Median [IQR] ; U/L         | 25.0 [14.0 – 44.0]        | 23.0 [14.0 – 40.0]      | 0.42    |
| Blood Urea Nitrogen (BUN); Mean (SD); mg/dl              | 38.1 ± 36.0               | 63.4 ± 131.2            | 0.02    |
| Blood Urea Nitrogen (BUN); Median [IQR]; mg/dl           | 29.0 [19.0 – 41.0]        | 34.5 [22.0 – 56.5]      | 0.91    |
| Creatinine; Mean (SD); mg/dl                             | 1.4 ± 1.3                 | 1.6 ± 1.9               | 0.31    |
| Creatinine; Median [IQR]; mg/dl                          | 1.0 [0.8 – 1.5]           | 1.1 [0.9 – 1.5]         | 0.68    |
| C-Reactive Protein (CRP); Mean (SD); mg/L                | 49.7 ± 65.4               | 69.3 ± 131.2            | 0.23    |
| C-Reactive Protein (CRP); Median [IQR]; mg/L             | 33.0 [23.0 – 50.0]        | 40.0 [26.0 – 58.0]      | 0.33    |
| Lactate Dehydrogenase (LDH); Mean (SD); U/L              | 438.6 ± 353.6             | 696.8 ± 1894.5          | 0.33    |
| Lactate Dehydrogenase (LDH); Median [IQR]; U/L           | 349.5 [277.5 – 467.0]     | 414.5 [241.0 – 556.0]   | 0.13    |
| Fibrinogen; Mean (SD); mg/dl                             | 286.7 ± 227.9             | 562.3 ± 1216.6          | 0.23    |
| Fibrinogen; Median [IQR]; mg/dl                          | 346.0 [56.0 – 477.0]      | 218.0 [3.9 – 561.0]     | 0.68    |
| D- Dimer; Mean (SD); ng/ml                               | 2979.3 ± 6778.1           | 2470.6 ± 6258.5         | 0.67    |
| D- Dimer; Median [IQR]; ng/ml                            | 1057.0 [510.0 – 2200.0]   | 992 [568.0 – 2180.0]    | 0.92    |

\* Data on patients' disposition were sparse.

## Results; Supplemental Table V. Subgroups of AIS patients younger or older than 55-year-old

Baseline characteristics, comorbidities, and laboratory findings among SARS-CoV-2 patients with an acute ischemic stroke, comparing those younger versus older than 55. [Blue ink indicates the post-hoc p values.](#)

| Parameter                                                              | Age <55-year-old<br>N = 67 (36.2%) | Age >55-year-old<br>N = 256 (79.3%) | P-value |
|------------------------------------------------------------------------|------------------------------------|-------------------------------------|---------|
| Sex; Female; N (%)                                                     | 29 (41.8)                          | 102 (39.8)                          | 0.77    |
| Large Vessel Occlusion; N (%)                                          | 30 (47.6)                          | 96 (43.6)                           | 0.58    |
| Intravenous Thrombolysis; N (%)                                        | 11 (16.4)                          | 33 (12.9)                           | 0.45    |
| Mechanical Thrombectomy; N (%)                                         | 8 (11.9)                           | 16 (6.3)                            | 0.11    |
| National Institutes of Health Stroke Scale (NIHSS) Score; Median [IQR] | 8.0 [4.0 – 17.0]                   | 9.0 [4.0 – 17.0]                    | 0.68    |
| Imaging Patterns                                                       |                                    |                                     |         |
| Embollic/Large Vessel athero-Thromboembolism; N (%)                    | 46 (78.0)                          | 160 (81.2)                          | 0.21    |
| Lacune; N (%)                                                          | 4 (6.8)                            | 22 (11.2)                           |         |
| Border-zone; N (%)                                                     | 9 (15.3)                           | 14 (7.1)                            |         |
| Vasculitis Pattern; N (%)                                              | 0 (0.0)                            | 1 (0.5)                             |         |
| TOAST                                                                  |                                    |                                     |         |
| Large-Artery Atherosclerosis; N (%)                                    | 14 (31.1)                          | 42 (33.6)                           | 0.05    |
| Cardio-embolism; N (%)                                                 | 7 (15.6)                           | 39 (31.2) <sup>A (0.04)</sup>       |         |
| Small-Vessel Occlusion; N (%)                                          | 4 (8.9)                            | 13 (10.4)                           |         |
| Stroke of Other Determined Etiology; N (%)                             | 7 (15.6) <sup>B (0.02)</sup>       | 6 (4.8)                             |         |
| Stroke of Undetermined Etiology; N (%)                                 | 13 (28.9)                          | 25 (20.0)                           |         |
| Interval Between Onset to Index Event; Median [IQR]; Days              | 4.0 [0.0 – 10.0]                   | 3.0 [0.0 – 8.0]                     | 0.22    |
| Mechanical Ventilation; N (%)                                          | 18 (26.9)                          | 67 (26.2)                           | 0.91    |
| Disposition*                                                           |                                    |                                     |         |
| Discharged Home; N (%)                                                 | 39 (59.4) <sup>B (0.002)</sup>     | 89 (38.9)                           | <0.001  |
| In Hospital Mortality; N (%)                                           | 8 (12.5)                           | 74 (31.8) <sup>A (0.01)</sup>       |         |
| Still in Hospital/Subacute Care; N (%)                                 | 18 (28.1)                          | 70 (30.0)                           |         |
| Length of Hospital Stay; Median (IQR); Days                            | 12.0 [5.0 – 18.0]                  | 7.0 [4.0 – 15.0]                    | 0.05    |
| Comorbidities                                                          |                                    |                                     |         |
| Hypertension; N (%)                                                    | 26 (39.4)                          | 176 (69.3)                          | <0.001  |
| Diabetes Mellitus; N (%)                                               | 20 (29.9)                          | 91 (35.8)                           | 0.36    |
| Ischemic Heart Disease; N (%)                                          | 9 (13.8)                           | 63 (27.3)                           | 0.03    |
| Atrial Fibrillation; N (%)                                             | 4 (6.1)                            | 41 (16.1)                           | 0.04    |
| Carotid Stenosis; N (%)                                                | 3 (4.6)                            | 35 (15.2)                           | 0.03    |
| Chronic Kidney Disease; N (%)                                          | 12 (18.2)                          | 30 (11.8)                           | 0.17    |
| Cardiac Ejection Fraction <40%; N (%)                                  | 4 (6.2)                            | 20 (8.7)                            | 0.51    |
| Active Neoplasm; N (%)                                                 | 4 (6.2)                            | 17 (7.4)                            | 0.74    |

|                                                          |                        |                         |        |
|----------------------------------------------------------|------------------------|-------------------------|--------|
| Rheumatological Disease; N (%)                           | 1 (1.5)                | 4 (1.7)                 | 0.92   |
| Prior Stroke or Transient Ischemic Attack; N (%)         | 1 (1.5)                | 4 (1.7)                 | 0.92   |
| Smoking; N (%)                                           | 8 (12.1)               | 45 (17.7)               | 0.28   |
| Laboratory Findings                                      |                        |                         |        |
| White Blood Cell Count x10 <sup>9</sup> /L; Mean (SD)    | 9.9 ± 4.8              | 9.8 ± 4.8               | 0.91   |
| White Blood Cell Count x10 <sup>9</sup> /L; Median [IQR] | 9.1 [7.3 – 11.6]       | 9.0 [6.7 – 11.1]        | 0.96   |
| Neutrophil Count x10 <sup>9</sup> /L; Mean (SD)          | 7.7 ± 4.7              | 7.7 ± 4.4               | 0.99   |
| Neutrophil Count x10 <sup>9</sup> /L; Median [IQR]       | 6.7 [4.8 – 9.1]        | 6.8 [4.8 – 9.3]         | 0.86   |
| Lymphocyte Count x10 <sup>9</sup> /L; Mean (SD)          | 2.0 ± 2.3              | 1.6 ± 1.4               | 0.05   |
| Lymphocyte x10 <sup>9</sup> /L; Median [IQR]             | 1.6 [1.2 – 2.2]        | 1.3 [0.9 – 1.9]         | <0.001 |
| Platelet Count x10 <sup>9</sup> /L; Mean (SD)            | 315.9 ± 201.9          | 314.2 ± 487.5           | 0.98   |
| Platelet Count x10 <sup>9</sup> /L; Median [IQR]         | 259.5 [179.0 – 398.5]  | 219.0 [158.5 – 315.0]   | 0.02   |
| Alanine Transaminase (ALT); Mean (SD); U/L               | 43.4 ± 60.4            | 69.3 ± 92.0             | 0.01   |
| Alanine Transaminase (ALT); Median [IQR] ; U/L           | 17.1 [6.1 – 56.4]      | 34.3 [12.0 – 99.0]      | 0.02   |
| Aspartate Transaminase (AST); Mean (SD); U/L             | 20.9 ± 16.2            | 35.2 ± 28.2             | <0.001 |
| Aspartate Transaminase (AST); Median [IQR] ; U/L         | 16.0 [10.4 – 25.0]     | 26.0 [15.0 – 44.0]      | <0.001 |
| Blood Urea Nitrogen (BUN); Mean (SD); mg/dl              | 68.0 ± 197.7           | 48.8 ± 53.6             | 0.46   |
| Blood Urea Nitrogen (BUN); Median [IQR]; mg/dl           | 30.0 [18.0 – 50.0]     | 33.0 [22.0 – 50.0]      | 0.38   |
| Creatinine; Mean (SD); mg/dl                             | 1.4 ± 1.5              | 1.5 ± 1.8               | 0.53   |
| Creatinine; Median [IQR]; mg/dl                          | 0.9 [0.8 – 1.2]        | 1.1 [0.9 – 1.5]         | <0.001 |
| C-Reactive Protein (CRP); Mean (SD); mg/L                | 87.0 ± 259.0           | 54.0 ± 55.0             | 0.34   |
| C-Reactive Protein (CRP); Median [IQR]; mg/L             | 32.0 [20.0 – 48.0]     | 38.0 [25.0 – 60.0]      | 0.06   |
| Lactate Dehydrogenase (LDH); Mean (SD); U/L              | 487.1 ± 334.5          | 635.3 ± 1716.0          | 0.64   |
| Lactate Dehydrogenase (LDH); Median [IQR]; U/L           | 397.5 [286.0 – 588.0]  | 371.0 [241.5 – 522.5]   | 0.44   |
| Fibrinogen; Mean (SD); mg/dl                             | 285.6 ± 266.5          | 547.8 ± 1181.4          | 0.27   |
| Fibrinogen; Median [IQR]; mg/dl                          | 338.5 [4.0 – 501.0]    | 220.0 [42.0 – 490.0]    | 0.70   |
| D- Dimer; Mean (SD); ng/ml                               | 1911.7 ± 3209.7        | 2884.7 ± 7135.6         | 0.47   |
| D- Dimer; Median [IQR]; ng/ml                            | 625.5 [426.0 – 2085.0] | 1100.0 [585.0 – 2205.0] | 0.22   |

\* Data on patients' disposition were sparse.

## Results; Supplemental Table VI. Subgroups of AIS patients younger or older than 65-year-old

Baseline characteristics, comorbidities, and laboratory findings among SARS-CoV-2 patients with an acute ischemic stroke, comparing those younger versus older than 65. [Blue ink indicates the post-hoc p values.](#)

| Parameter                                                              | Age <65-year-old<br>N = 148 (45.8%) | Age >65-year-old<br>N = 175 (54.2%) | P-value |
|------------------------------------------------------------------------|-------------------------------------|-------------------------------------|---------|
| Sex; Female; N (%)                                                     | 52 (35.1)                           | 78 (44.6)                           | 0.09    |
| Large Vessel Occlusion; N (%)                                          | 62 (47.3)                           | 64 (42.1)                           | 0.38    |
| Intravenous Thrombolysis; N (%)                                        | 29 (19.6)                           | 15 (8.6)                            | 0.004   |
| Mechanical Thrombectomy; N (%)                                         | 14 (9.5)                            | 10 (5.7)                            | 0.20    |
| National Institutes of Health Stroke Scale (NIHSS) Score; Median [IQR] | 8.0 [4.0 – 16.0]                    | 11.0 [5.0 – 20.0]                   | 0.15    |
| Imaging Patterns                                                       |                                     |                                     |         |
| Embollic/Large Vessel athero-Thromboembolism; N (%)                    | 94 (80.3)                           | 112 (80.6)                          | 0.31    |
| Lacune; N (%)                                                          | 9 (7.7)                             | 17 (12.2)                           |         |
| Border-zone; N (%)                                                     | 13 (11.1)                           | 10 (7.2)                            |         |
| Vasculitis Pattern; N (%)                                              | 1 (0.9)                             | 0 (0.0)                             |         |
| TOAST                                                                  |                                     |                                     |         |
| Large-Artery Atherosclerosis; N (%)                                    | 33 (38.8)                           | 23 (27.1)                           | 0.07    |
| Cardio-embolism; N (%)                                                 | 15 (17.6)                           | 21 (36.5) <sup>A(0.006)</sup>       |         |
| Small-Vessel Occlusion; N (%)                                          | 8 (9.4)                             | 9 (10.6)                            |         |
| Stroke of Other Determined Etiology; N (%)                             | 8 (9.4)                             | 5 (5.9)                             |         |
| Stroke of Undetermined Etiology; N (%)                                 | 21 (24.7)                           | 17 (20.0)                           |         |
| Interval Between Onset to Index Event; Median [IQR]; Days              | 4.0 [0.0 – 10.0]                    | 2.0 [0.0 – 8.0]                     | 0.10    |
| Mechanical Ventilation; N (%)                                          | 42 (28.4)                           | 43 (24.6)                           | 0.44    |
| Disposition*                                                           |                                     |                                     |         |
| Discharged Home; N (%)                                                 | 71 (52.2) <sup>B(0.002)</sup>       | 56 (34.8)                           | 0.01    |
| In Hospital Mortality; N (%)                                           | 29 (21.3)                           | 53 (32.9) <sup>A(0.03)</sup>        |         |
| Still in Hospital/Subacute Care; N (%)                                 | 36 (26.5)                           | 52 (32.3)                           |         |
| Length of Hospital Stay; Median (IQR); Days                            | 9.0 [5.0 – 18.0]                    | 7.0 [4.0 – 14.0]                    | 0.05    |
| Comorbidities                                                          |                                     |                                     |         |
| Hypertension; N (%)                                                    | 77 (52.4)                           | 125 (72.3)                          | <0.001  |
| Diabetes Mellitus; N (%)                                               | 54 (36.5)                           | 57 (32.9)                           | 0.51    |
| Ischemic Heart Disease; N (%)                                          | 25 (18.0)                           | 47 (29.9)                           | 0.02    |
| Atrial Fibrillation; N (%)                                             | 12 (8.2)                            | 33 (19.1)                           | 0.01    |
| Carotid Stenosis; N (%)                                                | 9 (6.5)                             | 29 (18.5)                           | 0.002   |
| Chronic Kidney Disease; N (%)                                          | 24 (16.3)                           | 18 (10.4)                           | 0.12    |
| Cardiac Ejection Fraction <40%; N (%)                                  | 6 (4.3)                             | 18 (11.5)                           | 0.03    |
| Active Neoplasm; N (%)                                                 | 11 (7.9)                            | 10 (6.4)                            | 0.61    |
| Rheumatological Disease; N (%)                                         | 1 (0.7)                             | 4 (2.5)                             | 0.22    |
| Prior Stroke or Transient Ischemic Attack; N (%)                       | 1 (0.7)                             | 4 (2.5)                             | 0.22    |

| Parameter                                                | Age <65-year-old<br>N = 148 (45.8%) | Age >65-year-old<br>N = 175 (54.2%) | P-value |
|----------------------------------------------------------|-------------------------------------|-------------------------------------|---------|
| Smoking; N (%)                                           | 18 (12.2)                           | 35 (20.2)                           | 0.06    |
| <b>Laboratory Findings</b>                               |                                     |                                     |         |
| White Blood Cell Count x10 <sup>9</sup> /L; Mean (SD)    | 9.8 ± 4.7                           | 9.8 ± 5.0                           | 0.96    |
| White Blood Cell Count x10 <sup>9</sup> /L; Median [IQR] | 9.1 [7.2 – 11.3]                    | 8.9 [6.5 – 11.1]                    | 0.54    |
| Neutrophil Count x10 <sup>9</sup> /L; Mean (SD)          | 7.7 ± 4.2                           | 7.7 ± 4.7                           | 0.97    |
| Neutrophil Count x10 <sup>9</sup> /L; Median [IQR]       | 6.9 [4.9 – 9.2]                     | 6.5 [4.7 – 9.2]                     | 0.52    |
| Lymphocyte Count x10 <sup>9</sup> /L; Mean (SD)          | 1.8 ± 2.0                           | 1.6 ± 1.3                           | 0.32    |
| Lymphocyte x10 <sup>9</sup> /L; Median [IQR]             | 1.4 [1.0 – 2.0]                     | 1.3 [0.8 – 1.9]                     | 0.06    |
| Platelet Count x10 <sup>9</sup> /L; Mean (SD)            | 306.5 ± 218.5                       | 321.8 ± 571.5                       | 0.77    |
| Platelet Count x10 <sup>9</sup> /L; Median [IQR]         | 266.0 [177.0 – 381.0]               | 207.0 [154.0 – 300.0]               | 0.03    |
| Alanine Transaminase (ALT); Mean (SD); U/L               | 61.2 ± 81.1                         | 65.4 ± 91.4                         | 0.69    |
| Alanine Transaminase (ALT); Median [IQR]; U/L            | 26.9 [7.0 – 80.4]                   | 32.8 [12.0 – 96.0]                  | 0.54    |
| Aspartate Transaminase (AST); Mean (SD); U/L             | 27.2 ± 22.4                         | 36.5 ± 29.6                         | 0.003   |
| Aspartate Transaminase (AST); Median [IQR]; U/L          | 21.0 [12.0 – 35.0]                  | 27.0 [15.5 – 47.5]                  | 0.01    |
| Blood Urea Nitrogen (BUN); Mean (SD); mg/dl              | 61.4 ± 138.9                        | 45.4 ± 54.8                         | 0.21    |
| Blood Urea Nitrogen (BUN); Median [IQR]; mg/dl           | 32.5 [21.4 – 56.0]                  | 32.0 [20.0 – 47.0]                  | 1.00    |
| Creatinine; Mean (SD); mg/dl                             | 1.5 ± 2.2                           | 1.6 ± 1.2                           | 0.59    |
| Creatinine; Median [IQR]; mg/dl                          | 1.0 [0.8 – 1.3]                     | 1.2 [0.9 – 1.5]                     | 0.004   |
| C-Reactive Protein (CRP); Mean (SD); mg/L                | 70.0 ± 178.0                        | 53.0 ± 60.0                         | 0.27    |
| C-Reactive Protein (CRP); Median [IQR]; mg/L             | 35.0 [25.0 – 60.0]                  | 37.0 [24.0 – 55.0]                  | 0.95    |
| Lactate Dehydrogenase (LDH); Mean (SD); U/L              | 548.9 ± 788.5                       | 653.6 ± 1975.0                      | 0.68    |
| Lactate Dehydrogenase (LDH); Median [IQR]; U/L           | 420.0 [283.5 – 558.5]               | 358.0 [220.0 – 503.0]               | 0.14    |
| Fibrinogen; Mean (SD); mg/dl                             | 421.3 ± 674.7                       | 528.5 ± 1347.3                      | 0.64    |
| Fibrinogen; Median [IQR]; mg/dl                          | 346.0 [4.0 – 506.0]                 | 166.4 [22.9 – 464.0]                | 0.30    |
| D- Dimer; Mean (SD); ng/ml                               | 2417.5 ± 6626.8                     | 2874.2 ± 6284.3                     | 0.69    |
| D- Dimer; Median [IQR]; ng/ml                            | 830.0 [510.0 – 2085.0]              | 1100.0 [578.0 – 2430.0]             | 0.09    |

\* Data on patients' disposition were sparse.

**Results; Supplemental Table VII. Subgroups of AIS patients with stroke as the chief complaints versus others.**

Baseline characteristics, comorbidities, and laboratory findings among SARS-CoV-2 patients with a stroke, based on stroke as the chief complaint versus the presence of stroke following COVID-19 symptoms. **Blue ink indicates the post-hoc p values.**

| Parameter                                                              | Stroke patients asymptomatic for SARS-CoV-2 infection<br>N = 104 (36.1%) | Stroke Following COVID-19 Symptoms<br>N = 184 (63.9%) | P-value |
|------------------------------------------------------------------------|--------------------------------------------------------------------------|-------------------------------------------------------|---------|
| Age; Mean (SD); Years                                                  | 69 ± 15                                                                  | 66 ± 16                                               | 0.17    |
| Age; Median [IQR]; Years                                               | 70 [60 – 79]                                                             | 67 [56 - 78]                                          | 0.20    |
| Sex; Female; N (%)                                                     | 49 (47.1)                                                                | 67 (36.4)                                             | 0.08    |
| Large Vessel Occlusion; N (%)                                          | 43 (46.2)                                                                | 75 (43.1)                                             | 0.62    |
| Intravenous Thrombolysis; N (%)                                        | 18 (17.3)                                                                | 24 (13.0)                                             | 0.33    |
| Mechanical Thrombectomy; N (%)                                         | 8 (7.7)                                                                  | 14 (7.6)                                              | 0.98    |
| National Institutes of Health Stroke Scale (NIHSS) Score; Median [IQR] | 10.0 [3.0 – 20.0]                                                        | 9.0 [5.0 – 16.0]                                      | 0.94    |
| Imaging Patterns                                                       |                                                                          |                                                       |         |
| Embollic/Large Vessel athero-Thromboembolism; N (%)                    | 67 (79.8)                                                                | 132 (81.0)                                            | 0.23    |
| Lacune; N (%)                                                          | 12 (14.3)                                                                | 13 (8.0)                                              |         |
| Border-zone; N (%)                                                     | 5 (6.0)                                                                  | 17 (10.4)                                             |         |
| Vasculitis Pattern; N (%)                                              | 0 (0.0)                                                                  | 1 (0.6)                                               |         |
| TOAST                                                                  |                                                                          |                                                       |         |
| Large-Artery Atherosclerosis; N (%)                                    | 13 (25.5)                                                                | 43 (38.7)                                             | 0.21    |
| Cardio-embolism; N (%)                                                 | 17 (33.3)                                                                | 28 (25.2)                                             |         |
| Small-Vessel Occlusion; N (%)                                          | 8 (15.7)                                                                 | 9 (8.1)                                               |         |
| Stroke of Other Determined Etiology; N (%)                             | 2 (3.9)                                                                  | 10 (9.0)                                              |         |
| Stroke of Undetermined Etiology; N (%)                                 | 11 (21.6)                                                                | 21 (18.9)                                             |         |
| Mechanical Ventilation; N (%)                                          | 28 (26.9)                                                                | 54 (29.3)                                             | 0.66    |
| Disposition*                                                           |                                                                          |                                                       |         |
| Discharged Home; N (%)                                                 | 36 (37.9)                                                                | 72 (42.4)                                             | 0.02    |
| In Hospital Mortality; N (%)                                           | 37 (38.9) <sup>B (0.006)</sup>                                           | 39 (22.9)                                             |         |
| Still in Hospital/Subacute Care; N (%)                                 | 22 (23.2)                                                                | 59 (34.7)                                             |         |
| Length of Hospital Stay; Median (IQR); Days                            | 6.0 [4.0 – 12.0]                                                         | 9.0 [5.0 – 17.0]                                      |         |
| Comorbidities                                                          |                                                                          |                                                       |         |
| Hypertension; N (%)                                                    | 69 (67.6)                                                                | 122 (66.3)                                            | 0.82    |
| Diabetes Mellitus; N (%)                                               | 35 (34.0)                                                                | 67 (36.4)                                             | 0.68    |
| Ischemic Heart Disease; N (%)                                          | 23 (25.3)                                                                | 45 (26.0)                                             | 0.90    |
| Atrial Fibrillation; N (%)                                             | 19 (18.6)                                                                | 22 (12.0)                                             | 0.12    |

| Parameter                                                | Stroke patients asymptomatic for SARS-CoV-2 infection<br>N = 104 (36.1%) | Stroke Following COVID-19 Symptoms<br>N = 184 (63.9%) | P-value |
|----------------------------------------------------------|--------------------------------------------------------------------------|-------------------------------------------------------|---------|
| Carotid Stenosis; N (%)                                  | 10 (11.0)                                                                | 28 (16.2)                                             | 0.25    |
| Chronic Kidney Disease; N (%)                            | 13 (12.7)                                                                | 28 (15.2)                                             | 0.57    |
| Cardiac Ejection Fraction <40%; N (%)                    | 10 (11.0)                                                                | 10 (5.8)                                              | 0.13    |
| Active Neoplasm; N (%)                                   | 5 (5.5)                                                                  | 13 (7.5)                                              | 0.54    |
| Rheumatological Disease; N (%)                           | 2 (2.2)                                                                  | 3 (1.7)                                               | 0.80    |
| Prior Stroke or Transient Ischemic Attack; N (%)         | 1 (1.1)                                                                  | 2 (1.2)                                               | 0.97    |
| Smoking; N (%)                                           | 15 (14.7)                                                                | 31 (16.8)                                             | 0.64    |
| Laboratory Findings                                      |                                                                          |                                                       |         |
| White Blood Cell Count x10 <sup>9</sup> /L; Mean (SD)    | 10.2 ± 5.4                                                               | 9.8 ± 4.5                                             | 0.54    |
| White Blood Cell Count x10 <sup>9</sup> /L; Median [IQR] | 8.9 [6.7 – 12.1]                                                         | 9.0 [7.2 – 11.1]                                      | 0.94    |
| Neutrophil Count x10 <sup>9</sup> /L; Mean (SD)          | 7.7 ± 4.8                                                                | 7.9 ± 4.2                                             | 0.75    |
| Neutrophil Count x10 <sup>9</sup> /L; Median [IQR]       | 6.4 [4.4 – 9.7]                                                          | 7.2 [5.1 – 9.2]                                       | 0.39    |
| Lymphocyte Count x10 <sup>9</sup> /L; Mean (SD)          | 1.7 ± 1.7                                                                | 1.7 ± 1.7                                             | 0.90    |
| Lymphocyte x10 <sup>9</sup> /L; Median [IQR]             | 1.4 [0.9 – 1.9]                                                          | 1.3 [0.9 – 1.9]                                       | 0.81    |
| Platelet Count x10 <sup>9</sup> /L; Mean (SD)            | 263.4 ± 201.5                                                            | 343.4 ± 557.7                                         | 0.10    |
| Platelet Count x10 <sup>9</sup> /L; Median [IQR]         | 224.0 [168.0 – 313.0]                                                    | 222.0 [150.0 – 335.0]                                 | 0.93    |
| Alanine Transaminase (ALT); Mean (SD); U/L               | 54.3 ± 92.7                                                              | 65.3 ± 81.9                                           | 0.34    |
| Alanine Transaminase (ALT); Median [IQR]; U/L            | 20.0 [7.0 – 75.0]                                                        | 32.3 [10.0 – 99.0]                                    | 0.11    |
| Aspartate Transaminase (AST); Mean (SD); U/L             | 32.9 ± 27.1                                                              | 33.9 ± 27.8                                           | 0.78    |
| Aspartate Transaminase (AST); Median [IQR]; U/L          | 24.6 [15.0 – 42.0]                                                       | 25.0 [14.0 – 44.2]                                    | 0.96    |
| Blood Urea Nitrogen (BUN); Mean (SD); mg/dl              | 58.1 ± 167.5                                                             | 50.1 ± 53.0                                           | 0.58    |
| Blood Urea Nitrogen (BUN); Median [IQR]; mg/dl           | 27.5 [19.0 – 46.5]                                                       | 33.0 [23.0 – 55.0]                                    | 0.05    |
| Creatinine; Mean (SD); mg/dl                             | 1.4 ± 1.1                                                                | 1.5 ± 1.2                                             | 0.88    |
| Creatinine; Median [IQR]; mg/dl                          | 1.1 [0.9 – 1.5]                                                          | 1.1 [0.9 – 1.5]                                       | 0.71    |
| C-Reactive Protein (CRP); Mean (SD); mg/L                | 65.0 ± 210.0                                                             | 56.0 ± 62.0                                           | 0.59    |
| C-Reactive Protein (CRP); Median [IQR]; mg/L             | 32.0 [24.0 – 46.0]                                                       | 38.0 [26.0 – 62.0]                                    | 0.07    |
| Lactate Dehydrogenase (LDH); Mean (SD); U/L              | 398.6 ± 223.1                                                            | 756.2 ± 2008.6                                        | 0.27    |
| Lactate Dehydrogenase (LDH); Median [IQR]; U/L           | 347.0 [216.0 – 507.0]                                                    | 407.0 [258.0 – 574.0]                                 | 0.31    |
| Fibrinogen; Mean (SD); mg/dl                             | 520.1 ± 650.6                                                            | 469.4 ± 1185.3                                        | 0.86    |
| Fibrinogen; Median [IQR]; mg/dl                          | 411.0 [53.9 – 594.0]                                                     | 178.0 [3.8 – 471.0]                                   | 0.20    |
| D- Dimer; Mean (SD); ng/ml                               | 2444.7 ± 7368.7                                                          | 2953.1 ± 6845.3                                       | 0.73    |
| D- Dimer; Median [IQR]; ng/ml                            | 691.0 [441.0 – 1100.0]                                                   | 1259.5 [585.0 – 2460.0]                               | 0.02    |

\* Data on patients' disposition were sparse.



## Results; Supplemental Table VIII. Subgroups of patients according to the imaging patterns.

Baseline characteristics, comorbidities, and laboratory findings among SARS-CoV-2 patients with a stroke, based on the neuroimaging pattern found when evaluating the patient. **Blue ink indicates the post-hoc p values.**

| Parameter                                                              | Embolic/Large Vessel Athero-Thromboembolism<br>N = 206 (80.5%) | Lacune<br>N = 26 (10.2%)          | Border-zone<br>N = 23 (9.0%)                             | Vasculitis Pattern<br>N = 1 (0.4%) | P-value |
|------------------------------------------------------------------------|----------------------------------------------------------------|-----------------------------------|----------------------------------------------------------|------------------------------------|---------|
| Age; Mean (SD); Year                                                   | 67 ± 15                                                        | 72 ± 18                           | 62 ± 18                                                  | 57 ± 0                             | 0.17    |
| Age; Median [IQR]; Year                                                | 68 [58 – 78]                                                   | 73 [62 – 88]                      | 59 [49 – 77]                                             | 57 [57 – 57]                       | 0.41    |
| Sex; Female; N (%)                                                     | 83 (40.3)                                                      | 11 (42.3)                         | 7 (30.4)                                                 | 1 (100.0)                          | 0.49    |
| Large Vessel Occlusion; N (%)                                          | 99 (50.0) <sup>A (&lt;0.001)</sup>                             | 23 (92.0)                         | 12 (52.2) <sup>C(0.01)</sup>                             | 1 (100.0)                          | 0.001   |
| Intravenous Thrombolysis; N (%)                                        | 34 (16.5)                                                      | 1 (3.8)                           | 2 (8.7)                                                  | 0 (0.0)                            | 0.28    |
| Mechanical Thrombectomy; N (%)                                         | 23 (11.2)                                                      | 0 (0.0)                           | 1 (4.3)                                                  | 0 (0.0)                            | 0.24    |
| National Institutes of Health Stroke Scale (NIHSS) Score; Median [IQR] | 11.0 [5.0 – 19.0]                                              | 5.0 [2.0 – 8.0]                   | 14.0 [6.0 – 17.0]                                        | 0.0 [0.0 – 0.0]                    | 0.03    |
| TOAST Criteria                                                         |                                                                |                                   |                                                          |                                    |         |
| Large-Artery Atherosclerosis; N (%)                                    | 54 (37.5)                                                      | 0 (0.0)                           | 2 (33.3)                                                 | 0 (0.0)                            | <0.001  |
| Cardio-embolism; N (%)                                                 | 43 (29.9)                                                      | 1 (5.3)                           | 1 (16.7)                                                 | 1 (100.0)                          |         |
| Small-Vessel Occlusion; N (%)                                          | 4 (2.8)                                                        | 13 (68.4) <sup>A(&lt;0.001)</sup> | 0 (0.0)                                                  | 0 (0.0)                            |         |
| Stroke of Other Determined Etiology; N (%)                             | 9 (6.3)                                                        | 1 (5.3)                           | 3 (50.0) <sup>A (&lt;0.001)</sup><br><sup>B (0.03)</sup> | 0 (0.0)                            |         |
| Stroke of Undetermined Etiology; N (%)                                 | 34 (23.6)                                                      | 4 (21.1)                          | 0 (0.0)                                                  | 0 (0.0)                            |         |
| Interval Between Onset to Index Event; Median [IQR]; Day               | 3.0 [0.0 – 10.0]                                               | 1.0 [0.0 – 6.0]                   | 5.0 [1.0 – 7.0]                                          | 23.0 [23.0 – 23.0]                 | 0.39    |
| Mechanical Ventilation; N (%)                                          | 63 (30.6)                                                      | 8 (30.8)                          | 6 (26.1)                                                 | 0 (0.0)                            | 0.89    |
| Disposition*                                                           |                                                                |                                   |                                                          |                                    |         |
| Discharged Home; N (%)                                                 | 79 (38.5)                                                      | 14 (53.8)                         | 10 (43.5)                                                | 1 (100.0)                          | 0.44    |
| In Hospital Mortality; N (%)                                           | 62 (30.2)                                                      | 3 (11.5)                          | 6 (26.1)                                                 | 0 (0.0)                            |         |
| Still in Hospital/Subacute Care; N (%)                                 | 64 (31.2)                                                      | 9 (34.6)                          | 7 (30.4)                                                 | 0 (0.0)                            |         |
| Length of Hospital Stay; Median (IQR); Day                             | 7.0 [5.0 – 16.0]                                               | 6.0 [4.0 – 14.0]                  | 15.0 [5.0 – 16.0]                                        | 37.0 [37.0 – 37.0]                 | 0.52    |
| Comorbidities                                                          |                                                                |                                   |                                                          |                                    |         |
| Hypertension; N (%)                                                    | 130 (63.4)                                                     | 16 (61.5)                         | 18 (78.3)                                                | 1 (100.0)                          | 0.45    |
| Diabetes Mellitus; N (%)                                               | 66 (32.2)                                                      | 8 (30.8)                          | 10 (43.5)                                                | 1 (100.0)                          | 0.35    |
| Ischemic Heart Disease; N (%)                                          | 56 (27.3)                                                      | 6 (23.1)                          | 3 (13.0)                                                 | 0 (0.0)                            | 0.45    |
| Atrial Fibrillation; N (%)                                             | 34 (16.6)                                                      | 4 (15.4)                          | 2 (8.7)                                                  | 1 (100.0)                          | 0.10    |
| Carotid Stenosis; N (%)                                                | 33 (16.1)                                                      | 1 (3.8)                           | 2 (8.7)                                                  | 0 (0.0)                            | 0.30    |
| Chronic Kidney Disease; N (%)                                          | 25 (12.2)                                                      | 5 (19.2)                          | 8 (34.8) <sup>A (0.01)</sup>                             | 1 (100.0)                          | 0.003   |
| Cardiac Ejection Fraction <40%; N (%)                                  | 16 (7.8)                                                       | 2 (7.7)                           | 1 (4.3)                                                  | 1 (100.0)                          | 0.61    |

| Parameter                                                 | Embolic/Large Vessel Athero-Thromboembolism<br>N = 206 (80.5%) | Lacune<br>N = 26 (10.2%) | Border-zone<br>N = 23 (9.0%) | Vasculitis Pattern<br>N = 1 (0.4%) | P-value |
|-----------------------------------------------------------|----------------------------------------------------------------|--------------------------|------------------------------|------------------------------------|---------|
| Active Neoplasm; N (%)                                    | 16 (7.8)                                                       | 2 (7.7)                  | 0 (0.0)                      | 0 (0.0)                            | 0.57    |
| Rheumatological Disease; N (%)                            | 4 (2.0)                                                        | 1 (3.8)                  | 0 (0.0)                      | 0 (0.0)                            | 0.81    |
| Prior Stroke or Transient Ischemic Attack; N (%)          | 2 (1.0)                                                        | 0 (0.0)                  | 1 (4.3)                      | 0 (0.0)                            | 0.50    |
| Smoking; N (%)                                            | 33 (16.1)                                                      | 2 (7.7)                  | 5 (21.7)                     | 0 (0.0)                            | 0.55    |
| Laboratory Findings                                       |                                                                |                          |                              |                                    |         |
| White Blood Cell Count; Mean (SD); x10 <sup>9</sup> /L    | 10.2 ± 5.2                                                     | 9.5 ± 2.6                | 9.4 ± 3.4                    | 7.1 ± 0.0                          | 0.79    |
| White Blood Cell Count; Median [IQR]; x10 <sup>9</sup> /L | 9.1 [6.7 – 11.8]                                               | 8.8 [7.6 – 11.0]         | 9.8 [7.0 – 11.6]             | 7.1 [7.1 – 7.1]                    | 0.40    |
| Neutrophil Count; Mean (SD); x10 <sup>9</sup> /L          | 7.9 ± 4.8                                                      | 7.6 ± 2.5                | 7.7 ± 3.2                    | 5.3 ± 0.0                          | 0.94    |
| Neutrophil Count; Median [IQR]; x10 <sup>9</sup> /L       | 7.0 [4.7 – 9.3]                                                | 7.1 [5.9 – 8.8]          | 8.0 [5.2 – 9.1]              | 5.3 [5.3 – 5.3]                    | 0.18    |
| Lymphocyte Count; Mean (SD); x10 <sup>9</sup> /L          | 1.6 ± 1.3                                                      | 1.7 ± 1.1                | 1.3 ± 0.5                    | 1.0 ± 0.0                          | 0.60    |
| Lymphocyte; Median [IQR]; x10 <sup>9</sup> /L             | 1.4 [0.9 – 1.9]                                                | 1.3 [1.0 – 2.0]          | 1.2 [0.9 – 1.6]              | 1.0 [1.0 – 1.0]                    | 0.65    |
| Platelet Count; Mean (SD); x10 <sup>9</sup> /L            | 332.7 ± 520.1                                                  | 283.1 ± 374.6            | 256.1 ± 176.7                | 268.0 ± 0.0                        | 0.92    |
| Platelet Count; Median [IQR]; x10 <sup>9</sup> /L         | 227.0 [163.0 – 328.0]                                          | 190.0 [145.0 – 261.0]    | 184.0 [135.0 – 338.0]        | 268.0 [268.0 – 268.0]              | 0.53    |
| Alanine Transaminase (ALT); Mean (SD); U/L                | 55.2 ± 68.6                                                    | 60.2 ± 68.3              | 67.4 ± 60.5                  | 156.0 ± 0.0                        | 0.45    |
| Alanine Transaminase (ALT); Median [IQR]; U/L             | 23.0 [7.0 – 85.0]                                              | 45.5 [18.7 – 65.0]       | 43.7 [15.0 – 110.0]          | 156.0 [156.0 – 156.0]              | 0.06    |
| Aspartate Transaminase (AST); Mean (SD); U/L              | 33.1 ± 28.6                                                    | 22.2 ± 12.4              | 27.4 ± 24.8                  | 77.0 ± 0.0                         | 1.00    |
| Aspartate Transaminase (AST); Median [IQR]; U/L           | 24.4 [13.0 – 44.0]                                             | 19.0 [12.4 – 35.0]       | 17.8 [13.0 – 37.5]           | 77.0 [77.0 – 77.0]                 | 0.28    |
| Blood Urea Nitrogen (BUN); Mean (SD); mg/dl               | 52.8 ± 120.1                                                   | 41.3 ± 46.4              | 54.7 ± 57.5                  | 13.0 ± 0.0                         | 0.96    |
| Blood Urea Nitrogen (BUN); Median [IQR]; mg/dl            | 33.0 [21.0 – 51.0]                                             | 29.0 [18.0 – 38.0]       | 35.5 [20.7 – 65.5]           | 13.0 [13.0 – 13.0]                 | 0.70    |
| Creatinine; Mean (SD); mg/dl                              | 1.4 ± 1.1                                                      | 1.5 ± 1.4                | 1.4 ± 0.9                    | 2.4 ± 0.0                          | 0.71    |
| Creatinine; Median [IQR]; mg/dl                           | 1.0 [0.8 – 1.4]                                                | 1.2 [0.9 – 1.5]          | 1.0 [0.9 – 1.9]              | 2.4 [2.4 – 2.4]                    | 0.30    |
| C-Reactive Protein (CRP); Mean (SD); mg/L                 | 59.0 ± 148.0                                                   | 40.0 ± 26.0              | 91.0 ± 133.0                 | 20.0 ± 0.0                         | 0.78    |
| C-Reactive Protein (CRP); Median [IQR]; mg/L              | 36.0 [25.0 – 51.0]                                             | 30.0 [25.0 – 46.0]       | 48.0 [24.0 – 87.0]           | 20.0 [20.0 – 20.0]                 | 0.62    |
| Lactate Dehydrogenase (LDH); Mean (SD); U/L               | 679.4 ± 1885.7                                                 | 345.2 ± 205.6            | 590.5 ± 335.5                | 312.0 ± 0.0                        | 0.95    |
| Lactate Dehydrogenase (LDH); Median [IQR]; U/L            | 349.5 [222.0 – 490.0]                                          | 367.0 [201.0 – 561.0]    | 581.5 [341.5 – 839.0]        | 312.0 [312.0 – 312.0]              | 0.57    |
| Fibrinogen; Mean (SD); mg/dl                              | 511.5 ± 1213.3                                                 | 217.4 ± 199.6            | 114.5 ± 223.6                | NA                                 | 0.71    |
| Fibrinogen; Median [IQR]; mg/dl                           | 154.7 [3.8 – 450.0]                                            | 120.0 [104 – 403.0]      | 2.8 [2.6 – 226.5]            | NA                                 | 0.54    |
| D- Dimer; Mean (SD); ng/ml                                | 1488.5 ± 1919.1                                                | 951.9 ± 701.9            | 1558.3 ± 1682.0              | 955.0 ± 0.0                        | 0.89    |
| D- Dimer; Median [IQR]; ng/ml                             | 1000.0 [510.0 – 2100.0]                                        | 781.0 [480.0 – 1850.0]   | 625.0 [550.0 – 3500.0]       | 955.0 [955.0 – 955.0]              | 0.42    |

\* Data on patients' disposition were sparse.
